# Supplementary material for: Genetic Landscape of SH3TC2 variants in Russian patients with Charcot–Marie–Tooth disease
Source: Front Genet. 2024 Jun 6;15:1381915. doi: 10.3389/fgene.2024.1381915 (PMC11187259; doi:10.3389/fgene.2024.1381915)
Supplement: Supplementary file 1 [file Table1.XLSX]

## Sheet: Лист1
Tools used in data processing
Alignment of reads to the reference genome
Name	Version	Description	Link
bwa	0.7.17-r1188	bwa (alignment via Burrows-Wheeler transformation)	https://github.com/lh3/bwa
Variant Search
Name	Version	Description	Link
strelka2	2.9.10	Small Variant Caller	https://github.com/Illumina/strelka
gatk	4		https://gatk.broadinstitute.org/hc/en-us
Annotation of variants (gene, transcript, functional significance)
Name	Version	Description	Link
SnpEff	5.0	Genomic variant annotations and functional effect prediction toolbox	https://pcingola.github.io/SnpEff/
DB: GRCh37 / hg19	(dbNSFP version 2.9 Academic)	integrated database of functional predictions from multiple algorithms (SIFT, Polyphen2, LRT and MutationTaster, PhyloP and GERP++, etc)
annovar	2017	Determining the functional significance of genetic variants	https://hpc.nih.gov/apps/ANNOVAR.html
vep	104.3	ENSEMBL VARIANT EFFECT PREDICTOR	http://www.ensembl.org/info/docs/tools/vep/script/index.html
Predicting the pathogenicity of variants
Name	Version	Description	Link
dbNSFP	4	pathogenicity prediction database for non-synonymous point substitutions (nsSNVs)	https://www.sites.google.com/site/jpopgen/dbNSFP
SPiP	2.1	predictions of pathogenicity of splice site mutations	https://github.com/raphaelleman/SPiP
mmsplice	2.3	predictions of pathogenicity of splice site mutations	https://github.com/gagneurlab/MMSplice_MTSplice
spliceai	1.3.1	predictions of pathogenicity of splice site mutations	https://github.com/Illumina/SpliceAI
spidex	1	predictions of pathogenicity of splice site mutations
Clinical and population data
Name	Version	Description	Link
GNOMAD	2 and 3	Population frequency database	https://gnomad.broadinstitute.org/
HGMD pro	2022.1	Human Gene Mutation Database	http://www.hgmd.cf.ac.uk/ac/index.php
Input data quality control
Name	Version	Description	Link
FastQC	0.11.9	Reading quality control	https://www.bioinformatics.babraham.ac.uk/projects/fastqc/
Other
Name	Version	Description	Link
igvtools	2.3.91	Estimation of coverage of forward and reverse reads at each point of the target area	http://software.broadinstitute.org/software/igv/igvtools
bcftools	1.10	utility for working with files in VCF format	http://samtools.github.io/bcftools/bcftools.html
bedtools	2.27	utility for working with files in BED format	https://bedtools.readthedocs.io/en/latest/index.html
